# Supplementary material
Source: PubMed Central journal article supplement (PMC3536243)
Supplement: JCM.01967-12_zjm999092210so1.pdf [file JCM.01967-12_zjm999092210so1.pdf]

Table S1: Primers used in this study.

| Integrase family | Name           | Oligo Sequence         | Specificity for prophage |
|------------------|----------------|------------------------|--------------------------|
| Sa1              | Sa1int-for     | AAGCTAAGTTCGGGCACA     | ΦETA                     |
|                  | Sa1int-rev     | GTAATGTTTGGGAGCCAT     |                          |
| Sa2              | Sa2int-for     | TCAAGTAACCCGTCAACTC    | ΦSa2MW                   |
|                  | Sa2int-rev     | ATGTCTAAATGTGTGCGTG    |                          |
| Sa3              | Sa3int-for     | GAAAAACAAACGGTGCTAT    | Φ13                      |
|                  | Sa3int-rev     | TTATTGACTCTACAGGCTGA   |                          |
| Sa4              | Sa4int-for     | ATTGATATTAACGGAACTC    | ΦSa4ms                   |
|                  | Sa4int-rev     | TAAACTTATATGCGTGTGT    |                          |
| Sa5              | Sa5int-for     | AAAGATGCCAAACTAGCTG    | Φ11                      |
|                  | Sa5int-rev     | CTTGTGGTTTTGTTCTGG     |                          |
| Sa6              | Sa6int-for     | GCCATCAATTCAAGGATAG    | ΦL54a                    |
|                  | Sa6int-rev     | TCTGCAGCTGAGGACAAT     |                          |
| Sa6390           | phi6390int-for | AGTCTTACCCTTATCATTATCC | Φ6390                    |
|                  | phi6390int-rev | CCCTCCTTTCTATTACGA     |                          |
| -                | Sak-for        | GTGCATCAAGTTCATTTCGAC  |                          |
|                  | Sak-rev        | TAAGTTGAATCCAGGGTTTT   |                          |

Table S2: Resistance phenotype in correlation to sequence and SCC*mec* types.

| Resistance phenotype          | ST5<br>N = 49     |                   |                             | ST225<br>N = 30         |                   |
|-------------------------------|-------------------|-------------------|-----------------------------|-------------------------|-------------------|
|                               | SCC <i>mec</i> II | SCC <i>mec</i> IV | SCC <i>mec</i> not typeable | SCC <i>mec</i> negative | SCC <i>mec</i> II |
| Oxa, Ery, Clin*, Cip          | 55% (27)          |                   |                             | 93% (28)                |                   |
| Oxa, Ery, Clin, Cip, Gen      | 2% (1)            |                   |                             | 3% (1)                  |                   |
| Oxa, Ery, Clin, Cip, Tet      |                   |                   |                             | 3% (1)                  |                   |
| Oxa, Ery, Clin, Cip, Ram      | 4% (2)            |                   |                             |                         |                   |
| Oxa, Ery, Clin                | 2% (1)            |                   |                             |                         |                   |
| Oxa, Ery, Clin, Cip, Ram, Fus | 2% (1)            |                   |                             |                         |                   |
| Oxa, Cip                      | 4% (2)            | 2% (1)            | 2% (1)                      |                         |                   |
| Oxa                           |                   |                   |                             | 6% (3)                  |                   |
| Oxa, Ram                      |                   |                   |                             | 2% (1)                  |                   |
| Oxa, Cip, Gen, Ram            |                   |                   |                             | 2% (1)                  |                   |
| Pen                           |                   |                   |                             | 8% (4)                  |                   |
| No resistance                 |                   |                   |                             | 8% (4)                  |                   |

clin\* inducible clindamycin resistance confirmed by D-zone test (3 isolates in each ST group)

Oxa: oxacillin, Ery: erythromycin, Clin: clindamycin, Cip: ciprofloxacin, Gen: gentamicin, Ram: rifampicin, Tet: tetracycline, Fus: fusidic acid
